# Supplementary material for: Peraluminous Rare Metal Granites in Iberia: Geochemical, Mineralogical, Geothermobarometric and Petrogenetic Constraints
Source: Preprints.org preprint supplement (doi:10.20944/preprints202401.0163.v1), 2024-01-03
Supplement: Supplementary file 1 [file supplementary]

## Sheet: White mica
Sample	F-ST-007A	F-ST-007A	F-ST-007A	F-ST-007A	F-ST-007A	F-ST-007A	F-ST-007A	F-ST-007A	F-ST-007A	F-ST-007A	F-ST-007A	F-ST-007A	F-ST-007B	F-ST-007B	F-ST-007B	F-ST-007B	F-ST-007B	F-ST-007B	F-ST-007B	F-ST-007B	F-ST-007B	F-ST-007B	F-ST-007B	F-ST-007B	F-ST-007B	F-ST-007B	F-ST-007B	F-ST-007B	F-ST-007B	F-ST-007B	F-ST-007B	F-ST-007B	F-ST-008A	F-ST-008A	F-ST-008A	F-ST-008A	F-ST-008A	F-ST-008A	F-ST-008A	F-ST-008A	F-ST-008A	F-ST-008A	F-ST-008A	F-ST-008A	F-ST-008A	F-ST-008A	F-ST-008A	F-ST-008A	F-ST-008A
SiO2 (wt.%)	45.798	44.422	45.495	44.383	45.592	45.427	45.162	45.436	45.836	45.203	44.39	43.242	47.428	43.062	47.967	46.015	45.193	47.257	48.039	45.011	45.111	48.649	47.924	47.493	48.282	45.293	45.774	47.587	47.7	46.149	46.413	48.598	44.772	44.911	44.431	44.131	44.129	44.374	44.4	45.559	45.186	43.056	45.025	44.859	44.8	44.875	44.325	42.854	47.478
TiO2	0.02	0	0	0	0	0	0	0.062	0	0	0	0.004	0.293	0.062	0.046	0	0.023	0.015	0.055	0.003	0.031	0.035	0	0	0.061	0.02	0.02	0.034	0.046	0	0.049	0	0	0.025	0.013	0	0	0.007	0	0.003	0	0.008	0	0	0	0.092	0.004	0.034	0.054
Al2O3	35.848	33.568	34.955	35.143	34.986	33.157	34.907	34.286	33.299	34.247	34.106	33.358	34.517	32.566	35.154	34.499	33.679	32.119	32.28	34.114	34.404	32.998	35.071	36.14	35.085	34.763	33.125	34.445	33.078	36.25	34.41	34.826	35.168	34.83	35.809	35.687	35.256	34.991	35.373	35.164	34.981	33.784	34.802	35.787	35.181	34.885	35.085	33.979	32.552
FeOt	1.875	2.354	1.815	1.57	2.442	2.827	1.621	1.898	2.802	1.723	2.018	1.923	0.421	0.941	0.366	2.281	0.45	0.697	0.989	0.408	1.551	0.757	0.296	0.271	0.319	1.399	0.464	0.38	1.216	0.876	3.059	0.214	1.254	1.271	1.038	0.916	0.976	0.849	1.223	1.305	1.225	1.265	1.074	1.094	0.889	1.222	1.2	1.159	1.771
MnO	0.185	0.073	0.044	0.007	0.15	0.062	0.066	0	0.132	0.048	0.096	0.179	0	0.044	0	0.052	0.092	0	0.004	0.029	0.158	0.026	0.015	0.107	0.044	0.147	0.022	0.015	0.037	0.037	0.055	0.022	0.044	0.048	0.129	0.172	0.22	0.114	0.117	0.063	0.074	0.037	0.162	0.092	0.151	0.143	0.121	0.044	0.018
MgO	0.015	0	0.012	0.005	0.003	0.012	0.031	0.048	0.015	0.012	0.006	0.011	0.296	0.498	0.157	0.023	0.378	1094	0.871	0.25	0.052	1164	0.202	0.096	0.376	0.024	0.489	0.549	0.753	0.124	0.233	0.301	0.01	0	0	0.001	0	0.013	0	0.017	0.011	0.009	0.009	0	0.027	0	0	0.016	0.44
CaO	0.047	0	0	0.023	0	0.026	0.026	0.017	0.021	0	0.01	0.035	0.073	0.119	0.042	0.112	0.06	0.067	0.168	0.085	0.063	0.116	0.131	0.139	0.035	0.014	0.078	0.116	0.058	0.077	0.128	0.129	0.003	0.007	0.036	0	0	0.013	0.007	0.059	0.033	0.021	0	0.017	0.057	0.033	0.01	0.023	0.443
Na2O	0.447	0.238	0.261	0.342	0.268	0.18	0.261	0.228	0.262	0.224	0.295	0.43	0.176	0.097	0.093	0.276	0.139	0.08	0.08	0.09	0.294	0.088	0.123	0.097	0.043	0.419	0.069	0.143	0.095	0.084	0.118	0.099	0.361	0.265	0.376	0.499	0.317	0.374	0.29	0.287	0.302	0.358	0.297	0.376	0.394	0.287	0.231	0.304	0.021
K2O	9.657	10.133	10.48	9.716	9.75	9.932	10.287	10.009	9.674	10.282	10.229	9.937	8.872	8.872	9.423	9.898	9.424	9.493	9.265	9.351	10.346	9.943	8.994	9.178	9.872	9.665	8.983	9.85	9.755	9.167	8.76	9.053	10.431	10.138	9.722	10.007	10.215	9.251	9.944	9.85	10.103	10.138	10.075	9.841	9.931	9.801	10.132	9.881	0.073
P2O5	0.089	0.045	0.088	0.174	0.083	0.089	0.153	0.103	0.047	0.034	0.069	0.053	0.002	0.037	0	0.032	0	0.032	0	0.037	0.065	0.011	0.003	0	0	0.041	0.022	0.009	0.041	0.021	0.096	0.002	0.067	0.01	0.144	0.192	0.057	0.045	0.034	0.042	0.019	0.087	0.03	0.091	0.111	0.045	0.048	0.027	0.168
Li2O*	0.237809	0.150743	0.0814941	0.109078	0.0861317	0.0218437	0.0154436	0.0346424	0.234128	0.0544426	0.16239	0.231835	0.0525259	0.0441166	0.0213326	0.128506	0.0534821	0.164914	0.0676346	0.0309605	0.0619423	0.101158	0.0276546	0.0221004	0.0326472	0.133683	0.0323645	0.0554072	0.0419966	0.0279266	0.0133617	0.0260367	0.191532	0.238732	0.187608	0.254547	0.194598	0.181975	0.199882	0.16239	0.251738	0.250803	0.209211	0.197676	0.146636	0.224988	0.175529	0.199882	0.0032729
Rb2O	0	0	0	0	0	0	0	0	0	0	0	0	0	0	0	0	0	0	0	0	0	0	0	0	0	0	0	0	0	0	0	0	0	0	0	0	0	0	0	0	0	0	0	0	0	0	0	0	0
BaO	0.006	0.025	0.04	0.018	0	0	0	0.092	0	0	0	0	0.004	0	0.117	0.115	0	0.086	0	0.11	0	0.071	0.1	0.113	0.094	0.099	0.016	0.112	0.028	0.07	0.126	0.078	0.009	0.027	0	0	0.035	0.037	0	0	0.005	0	0	0	0	0	0.057	0.094	0
F	0.684	0.485	0.305	0.38	0.318	0.113	0.087	0.16	0.676	0.225	0.513	0.671	0.219	0.192	0.111	0.43	0.222	0.519	0.265	0.147	0.248	0.359	0.135	0.114	0.153	0.443	0.152	0.228	0.185	0.136	0.078	0.129	0.581	0.686	0.572	0.72	0.588	0.559	0.6	0.513	0.714	0.712	0.621	0.595	0.475	0.656	0.544	0.6	0.027
Cl	0.01	0	0	0.015	0.009	0	0.016	0	0.017	0.002	0	0.004	0.008	0.001	0	0	0.005	0.015	0.009	0.014	0.001	0.008	0.001	0.001	0	0	0.049	0.011	0.021	0	0.01	0.005	0	0.011	0.015	0.011	0	0.001	0.006	0	0.005	0	0	0.002	0.004	0.011	0.007	0	0.019
TOTAL	94.9188	91.4937	93.5765	91.8851	93.6871	91.8468	92.6324	92.3736	93.0151	92.0544	91.8944	90.0788	92.3615	86.5351	93.4973	93.8615	89.7185	1184.54	92.0926	89.68	92.3859	1257.16	93.0227	93.7711	94.3966	92.4607	89.2954	93.5344	93.055	93.0189	93.5484	93.482	92.8915	92.4677	92.4726	92.5905	91.9876	90.81	92.1939	93.0244	92.9097	89.7258	92.3042	92.9517	92.1666	92.275	91.9395	89.2149	83.0673
Normalized to	22 Oxygens
Si (a.p.f.u)	6.03962	6.12459	6.13326	6.06196	6.11422	6.25099	6.15134	6.19848	6.18389	6.18996	6.08924	6.04558	6.36312	6.21934	6.37961	6.16731	6.28648	6.41378	6.48892	6.2661	6.16152	6.43651	6.38781	6.29459	6.37309	6.14206	6.3729	6.34951	6.41067	6.18373	6.22691	6.44056	6.05661	6.08328	6.01127	5.96669	6.02461	6.09171	6.03429	6.12948	6.0881	6.02864	6.10804	6.03784	6.09115	6.08339	6.05266	6.03422	6.68167
Al	5.57334	5.45622	5.55552	5.65878	5.53139	5.37895	5.60527	5.51429	5.29632	5.5288	5.51565	5.49819	5.45954	5.545	5.51206	5.45118	5.5231	5.13922	5.14043	5.59885	5.5399	5.14697	5.51105	5.64694	5.45976	5.55761	5.43703	5.41834	5.24097	5.72643	5.44258	5.44122	5.60865	5.56194	5.71162	5.68836	5.67447	5.6631	5.66764	5.57745	5.55645	5.57679	5.56595	5.67865	5.6392	5.57529	5.64815	5.64064	5.4008
AlIV	1.96038	1.87541	1.86674	1.93804	1.88578	1.74901	1.84866	1.80152	1.81611	1.81004	1.91076	1.95442	1.63688	1.78066	1.62039	1.83269	1.71352	1.58622	1.51108	1.7339	1.83848	1.56349	1.61219	1.70541	1.62691	1.85794	1.6271	1.65049	1.58933	1.81627	1.77309	1.55944	1.94339	1.91672	1.98873	2.03331	1.97539	1.90829	1.96571	1.87052	1.9119	1.97136	1.89196	1.96216	1.90885	1.91661	1.94734	1.96578	1.31833
AlVI	3.61297	3.58082	3.68878	3.72074	3.64561	3.62993	3.75661	3.71276	3.48021	3.71876	3.60489	3.54377	3.82266	3.76434	3.89167	3.61848	3.80958	3.553	3.62935	3.86495	3.70142	3.58348	3.89886	3.94153	3.83285	3.69967	3.80994	3.76785	3.65164	3.91017	3.66949	3.88178	3.66526	3.64523	3.72289	3.65505	3.69908	3.75481	3.70193	3.70693	3.64455	3.60543	3.67399	3.71649	3.73035	3.65868	3.70081	3.67486	4.08247
Ti	0.00198358	0	0	0	0	0	0	0.0063611	0	0	0	0.000420579	0.0295637	0.00673437	0.00460113	0	0.00240613	0.00153107	0.00558723	0.000314091	0.00318436	0.00348257	0	0	0.0060555	0.00203971	0.00209413	0.00341182	0.00464941	0	0.00494407	0	0	0.00254672	0.00132275	0	0	0.00072271	0	0.000303547	0	0.000842425	0	0	0	0.0093796	0.000410783	0.00360051	0.00571534
Fe	0.206809	0.271451	0.204649	0.17935	0.273907	0.325361	0.184665	0.216564	0.316176	0.197338	0.231529	0.224863	0.0472414	0.11367	0.0407135	0.255698	0.0523545	0.07912	0.111733	0.0475056	0.177183	0.083768	0.0329987	0.0300409	0.0352177	0.158674	0.0540309	0.0424074	0.136686	0.0981744	0.343256	0.0237205	0.141882	0.143991	0.117458	0.103584	0.111445	0.0974819	0.139019	0.146847	0.138045	0.148143	0.121859	0.123156	0.101095	0.138554	0.137052	0.136496	0.208457
Mn	0.0206655	0.00852536	0.00502449	0.000809852	0.0170394	0.00722665	0.00761468	0	0.0150848	0.00556766	0.0111548	0.0211981	0	0.00538287	0	0.00590351	0.0108401	0	0.000457667	0.0034197	0.0182799	0.00291381	0.00169356	0.0120125	0.00491958	0.0168854	0.00259449	0.00169533	0.00421209	0.00419954	0.00625038	0.00246967	0.00504181	0.00550729	0.0147836	0.0196983	0.0254413	0.0132564	0.0134691	0.00717961	0.00844541	0.00438832	0.0186155	0.0104889	0.0173904	0.0164206	0.0139957	0.005248	0.00214573
Mg	0.00294806	0	0.00241096	0.00101777	0.000599591	0.00246092	0.00629274	0.00975905	0.00301598	0.00244897	0.00122662	0.00229196	0.0591846	0.107192	0.0311195	0.00459415	0.0783627	0.221282	0.175339	0.0518681	0.010585	0.229515	0.0401266	0.0189623	0.0739663	0.00485038	0.101463	0.109171	0.150821	0.0247623	0.0465876	0.0594502	0.00201607	0	0	0.000201498	0	0.00265972	0	0.00340863	0.00220878	0.00187806	0.00181958	0	0.005471	0	0	0.00335762	0.0922841
Ca	0.00664133	0	0	0.00336603	0	0.00383356	0.00379458	0.00248501	0.00303577	0	0.00146985	0.00524318	0.0104943	0.0184158	0.00598543	0.0160845	0.00894297	0.00974354	0.0243154	0.0126792	0.00922019	0.0164448	0.0187096	0.01974	0.00495025	0.00203425	0.0116361	0.0165846	0.00835232	0.0110554	0.0184008	0.0183185	0.000434849	0.00101596	0.00521887	0	0	0.00191227	0.00101938	0.00850542	0.00476416	0.00315064	0	0.00245175	0.00830406	0.00479346	0.00146316	0.00347018	0.0668022
Na	0.114298	0.0636242	0.0682237	0.090571	0.0696873	0.0480257	0.0689293	0.0603096	0.0685367	0.0594751	0.0784633	0.116565	0.0457841	0.0271637	0.0239829	0.0717252	0.0374902	0.0210525	0.0209525	0.0242934	0.0778609	0.0225749	0.0317885	0.0249273	0.0110052	0.11017	0.0186266	0.036996	0.0247557	0.021824	0.030696	0.0254394	0.0946885	0.0695982	0.0986357	0.130815	0.0839133	0.0995517	0.0764201	0.0748683	0.0788953	0.0971931	0.0781216	0.0981266	0.103869	0.0754379	0.0611612	0.0829985	0.00573031
K	1.62475	1.78237	1.80248	1.69303	1.66816	1.74362	1.78758	1.74203	1.66511	1.7963	1.79016	1.77243	1.51858	1.63476	1.5989	1.69248	1.67245	1.64374	1.59663	1.6608	1.80285	1.67832	1.52944	1.55191	1.66246	1.67211	1.59559	1.67676	1.67261	1.5671	1.4994	1.53066	1.80024	1.75194	1.6781	1.72613	1.7792	1.62024	1.72419	1.6907	1.73664	1.811	1.74371	1.68987	1.72265	1.69509	1.76512	1.77506	0.0131068
P	0.00993688	0.00525277	0.010044	0.0201207	0.00942383	0.0103686	0.0176435	0.0118965	0.00536846	0.00394182	0.00801353	0.00627343	0.000227176	0.00452427	0	0.00363114	0	0.00367701	0	0.00436091	0.0075165	0.00123216	0.000338545	0	0	0.00470721	0.00259321	0.0010167	0.00466515	0.00238234	0.0109044	0.000224405	0.00767352	0.00114679	0.0164945	0.021978	0.00658835	0.00523022	0.00391218	0.00478405	0.00216735	0.0103134	0.00344561	0.0103698	0.0127774	0.00516476	0.00554926	0.00321878	0.020017
F	0.285302	0.211498	0.130051	0.164159	0.134885	0.0491811	0.0374801	0.0690383	0.288461	0.0974515	0.222577	0.296715	0.0929319	0.0877074	0.0466939	0.182284	0.0976729	0.222792	0.113216	0.0647264	0.107138	0.15023	0.0569138	0.047789	0.0638765	0.190008	0.0669341	0.0962215	0.0786397	0.0576385	0.0330988	0.054073	0.24859	0.293897	0.244772	0.307898	0.253903	0.242721	0.257917	0.218299	0.304271	0.315319	0.266455	0.2533	0.204268	0.281274	0.234953	0.267218	0.0120183
Cl	0.0022352	0	0	0.00347249	0.00204573	0	0.00369377	0	0.00388738	0.000464198	0	0.000947862	0.00181919	0.000244795	0	0	0.00117885	0.00345058	0.00206051	0.00330339	0.000231504	0.00179399	0.000225918	0.000224642	0	0	0.0115629	0.0024877	0.00478362	0	0.00227398	0.00112313	0	0.0025254	0.00343973	0.00252078	0	0.000232682	0.00138212	0	0.00114183	0	0	0.000456263	0.000921795	0.00252747	0.00162012	0	0.0045321
OH	3.71246	3.7885	3.86995	3.83237	3.86307	3.95082	3.95883	3.93096	3.70765	3.90208	3.77742	3.70234	3.90525	3.91205	3.95331	3.81772	3.90115	3.77376	3.88472	3.93197	3.89263	3.84798	3.94286	3.95199	3.93612	3.80999	3.9215	3.90129	3.91658	3.94236	3.96463	3.9448	3.75141	3.70358	3.75179	3.68958	3.7461	3.75705	3.7407	3.7817	3.69459	3.68468	3.73354	3.74624	3.79481	3.7162	3.76343	3.73278	3.98345
Pressure (Kbar)	2.51435	3.69048	3.80995	2.82448	3.54744	5.17199	4.05872	4.7053	4.50554	4.58874	3.20233	2.59714	6.94046	4.74041	7.1623	4.27806	5.90447	7.62087	8.62376	5.62775	4.19859	7.92503	7.27248	6.01449	7.07457	3.93106	7.07213	6.7571	7.57917	4.50339	5.09389	7.97918	2.50017	3.11991	2.1197	1.49709	2.30555	3.23647	2.44021	3.75785	3.18653	2.36161	3.46207	2.48962	3.22879	3.12138	2.6954	2.4393	11.1619
*: Lithium content estimated from [65]; Presure estimation after [60]; formulations and pressure estimations were carried out from the METALESCRITICOS base data [121]
[truncated: 12 more columns]

## Sheet: K-feldspar
Sample	F-ST-007A	F-ST-007A	F-ST-007A	F-ST-007A	F-ST-007A	F-ST-007A	F-ST-007A	F-ST-007A	F-ST-007A	F-ST-007A	F-ST-007A	F-ST-007A	F-ST-007A	F-ST-007A	F-ST-007A	F-ST-007A	F-ST-007A	F-ST-007A	F-ST-007A	F-ST-007A	F-ST-007A	F-ST-007A	F-ST-007A	F-ST-007A	F-ST-007A	F-ST-013A	F-ST-013A	F-ST-013A	F-ST-013A	F-ST-013A	F-ST-013A	F-ST-013A	GP-S4A-6 C2 P4	GP-S4A-6 C3 P1	GP-S4A-6 C3 P2	GP-S4A-6 C5 P2	GP-S4A-9 C3 P1	GP-S4A-10 C1 P2	GP-S4A-10 C4 P1	GP-S4A-10 C4 P2	GP-S4A-10 C4 P3	GP-S4A-10	GP-S4A-11 C1 P9	GP-S4A-11 C2 P4	GP-S4A-11	GP-S4A-11 C3 P2	GP-S4A-11 C5 P1	GP-S4A-11 C5 P7	GP-S4A-11 C6 P1
SiO2 (wt.%)	64.275	63.984	63.338	63.751	46.974	63.479	62.513	63.4	62.309	63.682	62.045	63.145	62.387	62.14	63.156	62.474	62.711	63.506	64.146	61.835	62.908	64.078	63.737	64.348	63.439	64.174	64.239	64.785	64.712	64.994	64.82	64.649	64.9934	64.3159	64.1784	63.947	63.3423	63.1687	57.8086	62.9881	57.8026	61.8836	64.6105	66.17	63.0783	63.9537	59.2882	61.42	65.3249
TiO2	0	0	0.027	0.05	0	0	0	0.001	0.015	0.004	0	0.05	0.004	0	0	0	0	0.02	0	0	0.015	0	0.041	0.083	0	0.048	0	0	0.039	0	0	0	0	0.0216	0.0006	0.0062	0.0165	0	0	0	0	0	0	0	0	0	0.0035	0.0134	0
Al2O3	18.514	18.478	18.607	18.588	34.82	17.925	19.208	18.254	18.746	18.02	18.602	17.98	18.763	18.514	17.989	18.444	18.826	18.279	18.146	19.203	18.516	18.204	18.434	18.062	18.448	18.982	18.77	18.472	18.548	18.676	18.856	18.717	18.1128	17.9874	18.2726	17.9741	18.2095	17.9113	17.1075	18.1904	18.5294	17.8368	18.1015	17.5794	17.8127	17.247	16.9847	17.5887	17.6484
FeOt	0.063	0.024	0	0.015	0.19	0.027	0.051	0	0	0.066	0.018	0.275	0.036	0	0	0.006	0	0.039	0.027	0.045	0	0.012	0	0.009	0.006	0.009	0	0	0.018	0.048	0.057	0	0.0284	0.0198	0.0255	0	0	0.0283	0.0043	0	0	0.0085	0	0	0.0085	0.0369	0	0.0667	0.0355
MnO	0	0	0	0.015	0.055	0.026	0	0	0	0.011	0.011	0	0.007	0.004	0.018	0.044	0.026	0	0.019	0.048	0	0.026	0.037	0.015	0.052	0	0	0.02	0.031	0.031	0	0	0	0	0.0319	0	0.0183	0.0137	0.0319	0.0086	0	0	0.0091	0	0.0076	0	0.0425	0.0076	0
MgO	0.013	0	0.016	0	0.012	0.008	0.001	0	0	0	0.036	0.006	0	0.012	0	0	0	0.016	0	0	0	0.019	0	0	0.002	0.012	0	0.007	0	0.011	0.002	0	0.0151	0.0091	0	0	0	0	0	0	0.0084	0.0015	0	0.0121	0	0.0076	0	0.0093	0.0061
CaO	0	0.011	0.003	0	0	0	0.001	0	0	0.008	0.006	0.021	0	0	0.029	0	0.036	0.021	0.003	0	0	0.004	0	0.004	0.028	0	0	0	0	0.016	0.02	0	0.0006	0.0054	0	0	0	0	0.1001	0.0051	0.1603	0.0033	0	0	0.0679	0.0553	0.0691	0.089	0
Na2O	0.258	0.208	0.293	0.244	0.181	0.222	0.174	0.23	0.651	0.214	0.294	0.183	0.417	0.317	0.238	0.597	0.576	0.046	0.082	0.208	0.243	0.212	0.258	0.19	0.22	0.192	0.231	0.236	0.252	0.217	0.233	0.221	0.1329	0.2145	0.5441	0.8925	0.6526	0.2551	2.8789	0.4796	3.0855	0.5192	0.1828	0.0718	0.4642	0.3931	1.5545	2.0299	0.3357
K2O	15.838	15.911	15.729	16.206	10.385	16.117	15.961	16.028	14.8	16.074	15.672	16.068	15.638	15.617	15.917	15.472	15.631	16.381	16.326	15.925	15.991	16.193	16.083	15.944	16	16.104	16.324	16.129	16.316	16.258	16.212	16.507	16.5041	16.266	15.3747	15.6259	16.4081	16.1957	15.6095	16.2886	15.1204	16.1592	16.1187	16.2705	15.9508	16.1497	16.3245	16.3416	16.3675
P2O5	0.199	0.314	0.722	0.42	0.031	0.054	0.259	0.292	0.927	0.218	0.785	0.088	0.875	0.963	0.193	1.007	0.981	0.21	0.191	1.024	0.821	0	0.247	0.039	0.221	0.004	0	0.073	0.055	0.032	0.035	0.171	0.151	0.5971	0.6308	0.7067	0.7979	0.3773	0.3458	0.2425	0.1335	0.1322	0.533	0	0.6316	0.0955	0.2282	0.2028	0.0858
F	0	0	0	0.017	0.273	0.016	0	0.038	0	0.035	0.002	0	0.02	0.04	0	0.045	0	0.029	0.032	0	0	0.067	0.036	0	0.049	0	0	0.032	0	0.001	0.027	0.04	0.2678	0.0887	0.1179	0.059	0.0892	0.0891	0.19514	0.4211	0.262	0.0599	0	0.1192	0.2368	0.0892	0.7906	0.12015	0.5051
Cl	0.002	0.001	0.003	0.01	0.011	0	0	0	0	0	0	0.015	0.009	0	0.017	0.001	0	0.001	0	0.012	0	0.011	0	0	0	0	0	0	0	0	0	0	0	0	0	0.0026	0.01	0.0211	0.0151	0.0173	0.0446	0	0.0119	0.0098	0.0435	0.0681	0.0018	0.0103	0.0081
BaO	0.009	0	0	0	0	0	0.052	0.045	0	0	0	0.058	0.018	0	0	0	0	0.033	0	0.061	0.004	0	0.05	0.113	0.098	0	0	0	0.055	0	0.003	0	0	0	0	0.0723	0.0636	0.003	0	0	0	0	0	0.0507	0	0.0755	0.0723	0	0
SrO	0	0	0	0	0	0	0	0	0	0	0	0	0	0	0	0	0	0	0	0	0	0	0	0	0	0	0	0	0	0	0	0	0	0.0399	0	0	0	0	0	0	0	0	0	0.1192	0	0.0199	0	0	0
TOTAL	99.171	98.956	98.749	99.4	94.664	97.907	98.22	98.311	97.448	98.335	97.494	97.889	98.174	97.627	97.609	98.124	98.865	98.584	98.972	98.401	98.498	98.832	98.923	98.842	98.598	99.525	99.639	99.754	100.026	100.293	100.279	100.314	100.221	99.6212	99.1962	99.3438	99.6414	98.0879	95.8792	98.6413	97.5431	96.6682	99.6062	100.454	98.3019	98.2173	95.4754	98.9911	100.32
Normalized to	32 Oxygens
Si (a.p.f.u.)	11.9469	11.9227	11.8176	11.8552	9.08228	11.9898	11.7691	11.9129	11.7408	11.9615	11.745	11.9448	11.7211	11.7315	11.9556	11.7347	11.7051	11.9187	11.9738	11.6174	11.789	11.978	11.9043	12.0207	11.8929	11.9059	11.9259	11.9808	11.9616	11.9675	11.9337	11.9143	11.9591	11.9163	11.8859	11.8761	11.7796	11.9066	11.1628	11.7951	10.8878	11.8808	11.9585	12.1396	11.8367	12.0473	11.5839	11.5068	11.9813
Ti	0	0	0.00378866	0.00699273	0	0	0	0.000141313	0.00212567	0.000565046	0	0.00711323	0.000565183	0	0	0	0	0.00282293	0	0	0.00211406	0	0.00575907	0.0116608	0	0.0066973	0	0	0.00542155	0	0	0	0	0.00300976	8.35698e-05	0.000865963	0.00230768	0	0	0	0	0	0	0	0	0	0.00051429	0.00188802	0
Al	4.05696	4.05924	4.09289	4.07513	7.93695	3.99144	4.26326	4.04364	4.16433	3.99035	4.1514	4.00976	4.15588	4.12069	4.0147	4.08428	4.14263	4.04441	3.99329	4.25335	4.09077	4.01171	4.05901	3.97786	4.07726	4.15176	4.10814	4.0273	4.04193	4.05417	4.09265	4.06661	3.9292	3.92897	3.98961	3.93538	3.99229	3.98017	3.89453	4.0158	4.11474	4.03715	3.9498	3.8022	3.94064	3.83024	3.91228	3.88479	3.8161
Fe	0.00881213	0.00336544	0	0.00209913	0.27907	0.00383772	0.00722553	0	0	0.00932909	0.00256417	0.0391472	0.00508983	0	0	0.000848109	0	0.00550816	0.00379274	0.0063623	0	0.00168804	0	0.00126522	0.000846467	0.00125653	0	0	0.00250382	0.00665118	0.00789714	0	0.00393257	0.00276068	0.00355394	0	0	0.00401422	0.000624851	0	0	0.00122805	0	0	0.00120032	0.00523092	0	0.00940372	0.00489985
Mn	0	0	0	0.00236278	0.00900765	0.00415975	0	0	0	0.00175014	0.00176381	0	0.00111399	0.000639666	0.0028863	0.00700063	0.00411069	0	0.00300419	0.00763883	0	0.0041168	0.00585364	0.00237355	0.00825745	0	0	0.00313295	0.00485374	0.00483507	0	0	0	0	0.00500431	0	0.00288269	0.00218735	0.00521774	0.00136412	0	0	0.00142668	0	0.00120802	0	0.00703372	0.00120607	0
Mg	0.00360113	0	0.00444905	0	0.00345781	0.00225193	0.000280578	0	0	0	0.0101562	0.00169151	0	0.00337633	0	0	0	0.00447524	0	0	0	0.0052931	0	0	0.000558783	0.00331792	0	0.00192927	0	0.00301859	0.000548756	0	0.00414085	0.00251273	0	0	0	0	0	0	0.00235806	0.000429184	0	0.00330834	0	0.00213363	0	0.00259664	0.00166739
Ca	0	0.00219629	0.000599766	0	0	0	0.000201728	0	0	0.0016101	0.00121701	0.00425652	0	0	0.00588234	0	0.00719991	0.00422307	0.000600037	0	0	0.000801178	0	0.000800664	0.0056245	0	0	0	0	0.00315678	0.00394541	0	0.000118298	0.00107204	0	0	0	0	0.0207114	0.00102331	0.0323535	0.000678858	0	0	0.0136525	0.011162	0.0144663	0.0178661	0
Na	0.0929821	0.0751506	0.105999	0.0879787	0.0678551	0.0813021	0.0635167	0.0837956	0.237846	0.0779379	0.10791	0.0671211	0.151906	0.11604	0.0873578	0.217427	0.208459	0.0167394	0.0296786	0.0757712	0.0882963	0.0768382	0.0934329	0.0688203	0.0799688	0.0690671	0.0831518	0.0846236	0.0903173	0.0774741	0.0831745	0.0789709	0.0474157	0.0770579	0.195384	0.321386	0.235315	0.0932318	1.07789	0.174136	1.1269	0.193273	0.0656018	0.0255408	0.168897	0.14358	0.588901	0.737374	0.119384
K	3.75573	3.78252	3.74411	3.84484	2.56168	3.88372	3.83366	3.84227	3.55788	3.85189	3.78489	3.87779	3.74831	3.7615	3.84415	3.70767	3.72219	3.92226	3.88797	3.81711	3.8232	3.86174	3.83232	3.79992	3.82677	3.8117	3.86635	3.80541	3.84768	3.81926	3.8079	3.88113	3.87439	3.8449	3.63271	3.70236	3.89293	3.89465	3.84548	3.89141	3.63361	3.95796	3.80614	3.80825	3.81868	3.88124	4.06917	3.90591	3.82993
Ba	0.000655459	0	0	0	0	0	0.00383589	0.00331306	0	0	0	0.00429892	0.00132506	0	0	0	0	0.00242672	0	0.0044905	0.000293711	0	0.00365909	0.00827113	0.00719859	0	0	0	0.00398342	0	0.000216411	0	0	0	0	0.00526115	0.0046343	0.000221564	0	0	0	0	0	0.00364453	0	0.00557265	0.00553495	0	0
Sr	0	0	0	0	0	0	0	0	0	0	0	0	0	0	0	0	0	0	0	0	0	0	0	0	0	0	0	0	0	0	0	0	0	0.0042866	0	0	0	0	0	0	0	0	0	0.0126805	0	0.00217367	0	0	0
Rb	0	0	0	0	0	0	0	0	0	0	0	0	0	0	0	0	0	0	0	0	0	0	0	0	0	0	0	0	0	0	0	0	0	0	0	0	0	0	0	0	0	0	0	0	0	0	0	0	0
P	0.0313158	0.0495369	0.114051	0.0661253	0.00507453	0.00863521	0.0412828	0.0464522	0.147885	0.0346674	0.12581	0.0140936	0.13918	0.153924	0.0309323	0.16014	0.155023	0.0333681	0.0301851	0.162881	0.13026	0	0.0390577	0.00616819	0.0350769	0.00062829	0	0.0114296	0.00860723	0.00498858	0.00545548	0.0266809	0.0235236	0.0936628	0.0989079	0.111118	0.125627	0.0602103	0.056533	0.0384459	0.0212898	0.0214882	0.0835213	0	0.100343	0.0152309	0.0377483	0.032167	0.0133233
F	0	0	0	0.00999897	0.16695	0.00955845	0	0.0225837	0	0.0207932	0.00119746	0	0.0118847	0.0238851	0	0.0267344	0	0.0172146	0.0188928	0	0	0.0396127	0.0212667	0	0.0290545	0	0	0.0187175	0	0.000582392	0.0157223	0.023316	0.155857	0.0519795	0.0690624	0.0346569	0.052467	0.053119	1.19182	0.249409	1.56145	0.0363733	0	0.0691679	0.140545	0.0531465	0.48857	0.71196	0.293015
Cl	0.000630081	0.000315832	0.000948725	0.00315191	0.00360482	0	0	0	0	0	0	0.00480934	0.00286595	0	0.00545456	0.000318366	0	0.000318103	0	0.00382128	0	0.00348514	0	0	0	0	0	0	0	0	0	0	0	0	0	0.000818424	0.00315202	0.00674097	0.00494209	0.00549087	0.0142391	0	0.00373313	0.00304735	0.0138354	0.0217432	0.000596088	0.00327067	0.00251805
Or (mol %)	97.4933	97.9961	97.1195	97.7043	96.9599	97.7914	98.3596	97.8675	93.7338	97.933	96.9009	98.1526	96.0791	96.907	97.5604	94.2924	94.4249	99.356	99.1512	97.864	97.7428	97.7955	97.477	98.1446	97.5967	98.1364	97.8946	97.6975	97.5887	97.7357	97.7497	98.0058	98.6838	97.8389	94.7722	92.0232	94.2405	97.6087	77.6975	95.6606	75.7756	95.3188	98.2694	98.9223	95.4089	96.0688	86.9715	83.7288	96.9362
Ab	2.41326	1.94697	2.74953	2.2357	2.56832	2.04717	1.62801	2.13254	6.26615	1.98155	2.76272	1.69705	3.89238	2.98952	2.21705	5.52955	5.2882	0.423768	0.756863	1.94036	2.25719	1.94587	2.37425	1.77363	2.03567	1.77821	2.10538	2.17257	2.28835	1.98258	2.13499	1.99417	1.20771	1.96084	5.09728	7.97681	5.68977	2.33647	21.7786	4.28069	23.5005	4.65456	1.69375	0.662808	4.21985	3.54881	12.5696	15.8067	3.02162
An	0	0.0569006	0.0155575	0	0	0	0.00517053	0	0	0.0409363	0.0311579	0.107619	0	0	0.149287	0	0.182648	0.10691	0.0153021	0	0	0.0202892	0	0.0206347	0.143176	0	0	0	0	0.0807828	0.101274	0	0.00301313	0.136358	0	0	0	0	0.418471	0.0251555	0.674703	0.0163488	0	0.329071	0.341106	0.329614	0.308772	0.382986	0
Formulations were carried out from the METALESCRITICOS base data [121].
[truncated: 6 more columns]

## Sheet: Plagioclase
Sample	F-ST-007A	F-ST-007A	F-ST-008A	F-ST-008A	F-ST-008A	F-ST-008A	F-ST-008A	F-ST-008A	F-ST-013A	F-ST-013A	F-ST-013A	F-ST-013A	F-ST-013A	F-ST-013A	F-ST-013A	GP-S4A-6 C1 P2	GP-S4A-6 C4 P1	GP-S4A-6 C5 P1	GP-S4A-9 C1 P2	GP-S4A-9 C4 P2	GP-S4A-9 C6 P1	GP-S4A-9 C7 P3	GP-S4A-10 C1 P1	GP-S4A-10 C1 P4	GP-S4A-10 C2 P4	GP-S4A-10 C2 P6	GP-S4A-10 C4 P2	GP-S4A-10 C5 P1	GP-S4A-10 C5 P2	GP-S4A-11 C2 P7	GP-S4A-11 C2 P10	GP-S4A-11 C3 P3 Pg	GP-S4A-11 C4 P3	GP-S4A-11 C4 P4	GP-S4A-11 C5 P4	GP-S4A-11 C5 P5	GP-S4A-11 C6 P3	GP-S4A-11 C6 P6	GP-S4A-12 C1 P2	GP-S4A-12 C2 P3	GP-S4A-12 C2 P6	GP-S4A-12 C2 P14	GP-S4A-12 C3 P2	GP-S4A-12 C3 P4	GP-S4A-12 C4 P4	GP-S4A-12 C4 P5	GP-S4A-12 C6 P2	GP-S4A-12 C6 P4	GP-S4A-12 C7 P1
SiO2 (wt.%)	68.592	67.596	67.671	67.339	67.894	67.446	65.486	67.459	68.544	69.164	67.534	68.587	69.339	68.131	69.081	67.5176	69.2077	67.6905	69.1579	68.9782	68.0876	68.3561	67.1255	68.0435	67.8648	67.8166	67.86	67.8107	67.2212	69.1615	69.0734	67.8943	68.5427	68.6068	67.9063	68.6582	68.7889	69.1221	69.5445	68.8176	68.2875	69.1027	69.1737	68.4119	68.7217	68.2596	68.2152	68.7096	68.5993
TiO2	0	0.003	0	0	0	0.021	0	0	0.009	0	0	0	0	0.054	0	0	0	0.0071	0	0	0	0	0.0204	0.0066	0	0	0.0128	0	0	0.0064	0.0007	0	0.025	0.0217	0	0.0068	0	0	0.012	0.0257	0	0	0	0	0	0	0	0	0
Al2O3	19.537	19.17	18.95	19.219	19.075	19.685	19.922	19.074	19.857	19.786	20.08	19.669	19.65	19.93	19.485	19.3765	19.0395	19.1237	18.8768	18.969	18.9374	19.0403	19.3818	18.956	19.2375	18.6344	18.8437	19.0603	18.9651	19.0669	18.6408	18.9323	19.0692	19.4163	19.2636	18.9264	18.7904	19.0508	18.7014	18.9276	18.6846	18.8176	18.9546	18.6827	18.8358	18.7012	18.923	19.0404	19.0233
FeOt	0	0.012	0	0	0.03	0.003	0.042	0.006	0.045	0	0	0	0	0	0.054	0.0556	0.06	0	0	0.02	0.0286	0	0	0.0129	0.0143	0.0544	0	0.0043	0.0114	0.0057	0	0.0329	0.0343	0	0.0414	0	0.0486	0.0229	0	0.0115	0.0129	0	0.0358	0.0372	0.0186	0.0343	0.043	0.0072	0
MnO	0.015	0.007	0.007	0.062	0.011	0	0	0.026	0.017	0	0.041	0	0	0	0.058	0.0153	0	0.0306	0	0.0015	0.0138	0	0	0.0061	0.0215	0	0.0153	0.0152	0	0.0092	0.0414	0.0031	0.0138	0	0.0519	0	0.0153	0.0598	0	0	0	0	0	0.026	0	0.0031	0	0.0215	0
MgO	0	0	0.018	0.005	0	0	0	0	0	0.004	0.004	0	0	0.003	0.013	0	0	0.0147	0	0	0	0	0.032	0	0	0	0	0	0.0096	0	0.0147	0	0	0.0081	0	0.031	0.0408	0.0081	0	0	0.0326	0.0277	0	0	0.0016	0.0081	0.0114	0	0.0212
CaO	0.022	0	0.001	0.044	0.044	0.066	0.134	0.018	0.03	0.006	0.035	0.025	0.032	0.023	0	0.0211	0.0345	0.0453	0.072	0.0396	0.0976	0.0567	0.0254	0.0686	0.0546	0.0133	0.0335	0.0328	0.046	0.1004	0.1159	0.0969	0.0714	0.1078	0.0221	0.0431	0.0484	0.0258	0.0572	0.0255	0.0635	0.0247	0.0652	0.0293	0.0243	0.042	0.0585	0.0393	0.0452
Na2O	11.585	11.551	11.519	11.422	11.677	11.733	11.256	11.669	12.049	11.744	11.803	11.921	12.011	11.713	11.898	12.0226	11.5612	12.2806	11.8387	11.8882	11.7637	11.7121	12.1803	12.4845	12.1804	12.5603	12.2121	12.4662	12.7215	11.9453	11.8272	12.0316	11.5231	11.8607	12.0335	11.9651	11.9852	11.8001	12.0078	12.1021	11.9374	12.1137	11.7043	11.9594	11.8569	11.7164	11.6871	11.3605	11.9149
K2O	0.149	0.088	0.119	0.139	0.123	0.144	0.078	0.09	0.084	0.097	0.091	0.138	0.075	0.092	0.118	0.1033	0.1301	0.1461	0.1977	0.1012	0.169	0.1144	0.1249	0.0819	0.1171	0.098	0.114	0.1544	0.1508	0.0917	0.0655	0.128	0.1243	0.0853	0.1111	0.1293	0.1723	0.1487	0.1342	0.0821	0.1795	0.0921	0.1037	0.136	0.1025	0.0848	0.1392	0.1271	0.1172
P2O5	0.146	0.093	0.027	0.18	0.9	0.564	0.722	0.158	0.126	0.042	0.18	0.084	0.073	0.236	0.055	0.3584	0.0826	0.0582	0.2696	0.2745	0.3126	0.2807	0.0419	0.3698	0.3339	0.1179	0.0513	0.0102	0.0081	0.1695	0.0981	0.3617	0.2915	0.4428	0.2496	0.1507	0.0744	0.2237	0.0025	0.0314	0.1244	0.1576	0.2009	0.2466	0.1097	0.1488	0.2694	0.1089	0.1612
F	0	0.048	0	0	0.034	0.011	0.009	0.01	0.004	0	0.02	0.017	0	0.027	0	0.0275	0	0.0826	0	0	0.2482	0.1656	0.1927	0.0275	0.1655	0.1651	0.1372	0	0.2735	0.0277	0.1934	0.0276	0	0.083	0.055	0	0	0	0.0277	0	0	0	0	0.2759	0.0829	0.248	0	0.0277	0.4134
Cl	0	0	0.021	0	0	0	0.017	0.007	0	0	0	0	0	0	0	0.0096	0	0.0061	0	0	0.0075	0	0.0403	0.0063	0.0055	0	0	0.0059	0.0206	0.0227	0.01	0.0134	0	0	0.0046	0.0064	0	0.0005	0.0129	0.0168	0.0024	0.0041	0.0217	0.0213	0.0249	0.0448	0	0	0
BaO	0.008	0.086	0	0	0.013	0	0	0.047	0.028	0.019	0	0	0.084	0.042	0	0.0335	0	0.0059	0.0406	0.0396	0.0386	0	0.0247	0.0307	0	0	0	0.0325	0	0	0.0535	0.0178	0	0	0.0661	0.0258	0	0.0198	0	0.0168	0	0.0396	0.0356	0.0267	0.0455	0.0346	0.004	0.0089	0
SrO	0	0	0	0	0	0	0	0	0	0	0	0	0	0	0	0.0207	0	0.1245	0	0.0621	0.0414	0.0414	0.0207	0	0	0	0	0	0.0207	0	0	0	0.269	0.1037	0.062	0	0.0207	0.1861	0	0	0.0827	0	0	0.0414	0	0.1034	0.0415	0	0
TOTAL	100.054	98.674	98.333	98.442	99.845	99.675	97.686	98.596	100.796	100.862	99.788	100.441	101.264	100.251	100.808	99.5733	100.116	99.6906	100.468	100.399	99.7477	99.7673	99.2157	100.094	99.9984	99.4965	99.2799	99.614	99.4485	100.676	100.163	99.5824	99.9859	100.746	99.8738	99.9578	100.016	100.688	100.5	100.13	99.4865	100.386	100.296	99.9277	99.8511	99.4441	99.4481	99.4609	100.335
Normalized to	32 Oxygens
Si (a.p.f.u.)	11.9676	11.9659	12.0155	11.9488	11.8681	11.8258	11.7093	11.9602	11.8986	11.9717	11.8351	11.9373	11.9717	11.8726	11.9807	11.8701	12.4355	12.6559	13.1564	13.5097	13.7795	14.1931	14.4385	14.8924	15.2074	15.6745	16.0712	16.4268	16.6742	17.2568	17.6734	17.8972	18.3517	18.5896	18.9758	19.5177	19.9309	20.2648	20.7786	21.0407	21.4066	21.816	22.1969	22.0406	22.1624	22.0841	22.1024	22.2024	21.9684
Ti	0	0.000399395	0	0	0	0.00276915	0	0	0.00117497	0	0	0	0	0.00707703	0	0	0	0.000998343	0	0	0	0	0.00330004	0.00108637	0	0	0.00227982	0	0	0.00120097	0.000134698	0	0.00503396	0.00442198	0	0.00145378	0	0	0.00269643	0.00590948	0	0	0	0	0	0	0	0	0
Al	4.01862	4.0007	3.96677	4.02045	3.931	4.06907	4.19956	3.98684	4.06376	4.03758	4.14858	4.03583	3.99971	4.09446	3.98394	4.01608	4.03323	4.21527	4.2336	4.37992	4.51829	4.66082	4.91491	4.89118	5.08214	5.07762	5.26124	5.44342	5.54602	5.60873	5.6229	5.8836	6.01914	6.20235	6.34623	6.34295	6.41847	6.58457	6.58741	6.82251	6.90523	7.00378	7.17056	7.09608	7.16135	7.13303	7.22828	7.25349	7.18212
Fe	0	0.00159858	0	0	0.00394638	0.000395841	0.00565145	0.000800532	0.00587851	0	0	0	0	0	0.00704768	0.00735599	0.00811313	0	0	0.00294775	0.00435572	0	0	0.00212469	0.00241142	0.00946201	0	0.000783881	0.002128	0.00107028	0	0.00652643	0.00691092	0	0.008706	0	0.0105967	0.0050523	0	0.00264598	0.00304315	0	0.00864492	0.00901906	0.00451402	0.00835099	0.0104846	0.00175083	0
Mn	0.00221684	0.00104963	0.00105281	0.00931878	0.00162875	0	0	0.00390467	0.0024997	0	0.00608615	0	0	0	0.00852048	0.00227846	0	0.00484617	0	0.000248849	0.00236568	0	0	0.00113089	0.00408093	0	0.00306928	0.00311896	0	0.00194444	0.00897263	0.000692189	0.00312972	0	0.0122848	0	0.003755	0.0148504	0	0	0	0	0	0.00709538	0	0.000849551	0	0.00588481	0
Mg	0	0	0.00476315	0.00132223	0	0	0	0	0	0.00103185	0.0010447	0	0	0.000779121	0.00336008	0	0	0.00409605	0	0	0	0	0.0102581	0	0	0	0	0	0.00354889	0	0.00560541	0	0	0.00327091	0	0.0131335	0.0176177	0.0035391	0	0	0.0152302	0.0130329	0	0	0.000768998	0.00390556	0.00550483	0	0.0101181
Ca	0.00411291	0	0.000190254	0.00836572	0.00824134	0.0123997	0.0256734	0.00341953	0.00558011	0.00111281	0.00657219	0.00466226	0.00592002	0.00429461	0	0.0039748	0.00664237	0.00907525	0.0146764	0.00831043	0.0211646	0.0126147	0.00585413	0.0160878	0.0131098	0.00329384	0.00850107	0.00851379	0.0122262	0.0268426	0.031775	0.0273697	0.0204836	0.0312979	0.00661725	0.0131283	0.0150261	0.00810476	0.0183123	0.00835402	0.0213292	0.00835549	0.0224178	0.0101147	0.008397	0.01456	0.0203099	0.0136072	0.01551
Na	3.91917	3.96472	3.96571	3.92975	3.95775	3.98885	3.90242	4.01144	4.0555	3.94147	4.01058	4.02293	4.02091	3.95764	4.00097	4.0983	4.02791	4.45197	4.36682	4.51457	4.61612	4.71523	5.07994	5.29806	5.29223	5.6289	5.60779	5.85538	6.11849	5.7791	5.86755	6.14953	5.98206	6.2313	6.52003	6.59506	6.73317	6.70778	6.95637	7.17444	7.25576	7.41522	7.2822	7.4708	7.41415	7.34983	7.34228	7.11782	7.39838
K	0.0331665	0.0198742	0.0269568	0.0314668	0.0274307	0.0322119	0.0177934	0.0203575	0.0186032	0.0214204	0.0203456	0.0306424	0.0165204	0.0204537	0.0261089	0.0231697	0.0298242	0.0348496	0.0479824	0.0252869	0.043635	0.0303046	0.034275	0.0228689	0.0334771	0.0288978	0.0344446	0.0477181	0.0477223	0.0291909	0.0213811	0.0430471	0.0424587	0.0294871	0.0396083	0.0468938	0.0636905	0.0556184	0.0511548	0.0320247	0.0717881	0.0370955	0.0424532	0.0558999	0.0421724	0.0350021	0.0575411	0.0523974	0.0478838
Ba	0.000546905	0.00596505	0	0	0.000890398	0	0	0.00326504	0.00190448	0.0012886	0	0	0.00568261	0.00286775	0	0.00230767	0	0.000432223	0.00302629	0.00303892	0.00306086	0	0.00208171	0.00263274	0	0	0	0.00308481	0	0	0.00536355	0.00183849	0	0	0.0072374	0.00287373	0	0.00227448	0	0.00201261	0	0.00489853	0.00447601	0.00337049	0.00574943	0.00438614	0.000507817	0.00112684	0
Sr	0	0	0	0	0	0	0	0	0	0	0	0	0	0	0	0.00211021	0	0.0134975	0	0.00705249	0.00485829	0.00498446	0.00258179	0	0	0	0	0	0.00297732	0	0	0	0.0417622	0.0162929	0.0100461	0	0.00347772	0.0316366	0	0	0.0150324	0	0	0.00773407	0	0.0193979	0.00779691	0	0
Rb	0	0	0	0	0	0	0	0	0	0	0	0	0	0	0	0	0	0	0	0	0	0	0	0	0	0	0	0	0	0	0	0	0	0	0	0	0	0	0	0	0	0	0	0	0	0	0	0	0
P	0.0215666	0.0139382	0.00405883	0.0270412	0.133196	0.0837237	0.109299	0.0237167	0.018518	0.0061549	0.0267065	0.0123777	0.0106708	0.0348185	0.00807578	0.0533462	0.0125657	0.00921268	0.0434221	0.0455169	0.0535615	0.0493447	0.00763036	0.068524	0.0633466	0.0230711	0.0102861	0.00209195	0.00170106	0.0358066	0.0212507	0.080723	0.066077	0.10158	0.0590517	0.0362699	0.0182506	0.0555251	0.000632397	0.00812807	0.033016	0.0421244	0.0545792	0.0672637	0.0299521	0.0407583	0.0739013	0.0297926	0.043706
F	0	0.0268752	0	0	0.0187981	0.00610029	0.00508992	0.0056077	0.0021962	0	0.0110857	0.0093583	0	0.0148816	0	0.0152917	0	0.0488463	0	0	0.158874	0.108754	0.1311	0.0190369	0.117299	0.120695	0.102772	0	0.214576	0.0218606	0.156513	0.0230116	0	0.071132	0.0486115	0	0	0	0.0261769	0	0	0	0	0.281143	0.0845597	0.253778	0	0.0283105	0.418731
Cl	0	0	0.00631993	0	0	0	0.00515211	0.00210354	0	0	0	0	0	0	0	0.00286064	0	0.00193308	0	0	0.00257265	0	0.0146924	0.00233707	0.00208894	0	0	0.00242248	0.00866082	0.00960009	0.00433672	0.00598701	0	0	0.00217872	0.00308368	0	0.000248456	0.00653274	0.00870609	0.00127518	0.0021939	0.0118022	0.0116312	0.0136106	0.0245667	0	0	0
Ab (mol %)	98.9886	99.3264	99.1757	98.7319	99.0443	98.894	98.8984	99.2344	99.3	99.3734	99.1582	99.13	99.3054	99.2876	99.0594	99.181	99.1028	98.5218	98.5181	99.0361	98.3995	98.9943	98.9279	99.2001	99.0517	99.4314	99.1861	98.945	98.9252	99.0067	98.7695	98.8277	98.2293	98.727	98.8509	98.8603	98.4851	98.2997	99.0113	99.4126	98.328	99.1525	99.0567	98.8853	99.2359	98.9485	98.767	98.9846	99.0162
An	0.103882	0	0.00475793	0.210182	0.206243	0.30742	0.650635	0.0845919	0.13663	0.0280565	0.162492	0.114884	0.146208	0.107741	0	0.147261	0.163429	0.499532	0.33111	0.337016	0.554717	0.369488	0.164283	0.301226	0.245369	0.0581839	0.15036	0.143867	0.245814	0.459864	0.534875	0.439852	1.02212	0.754014	0.252636	0.196793	0.270653	0.582393	0.260642	0.115757	0.492762	0.111725	0.304939	0.236251	0.112391	0.457164	0.378088	0.18923	0.207578
Or	0.851517	0.64734	0.674143	0.790578	0.708747	0.798616	0.450936	0.58437	0.502136	0.572547	0.503028	0.755069	0.548354	0.585077	0.646426	0.616566	0.733795	0.780784	1.15079	0.621383	0.995391	0.636233	0.708019	0.477488	0.626573	0.510463	0.609228	0.858474	0.771587	0.500094	0.450198	0.721345	0.6972	0.467185	0.710233	0.746018	0.931591	0.848397	0.728096	0.471638	0.972852	0.561523	0.638358	0.784518	0.641418	0.530272	0.780863	0.74434	0.640852
Formulations were carried out from the METALESCRITICOS base data [121].
[truncated: 18 more columns]

## Sheet: CGMs
Sample	F-ST-008A	F-ST-008A	F-ST-008A	F-ST-008A	F-ST-008A	F-ST-008A	FST016A	FST017A	FST007A	FST007A	FST007A	FST007A	FST007A	FST007A	FST007A	FST007A	FST007A	FST007A	FST007A	FST007A	FST007A	FST007A	FST034	FST034	FST034	FST034	FST034	FST034	FST034	FST034	FST034	FST034	FST034	FST034	FST034	FST034	FST034	FST034	FST034	FST008A	FST008A	FST008A	FST008A	FST008A	FST008A	FST008A	FST008A	FST008A	FST008A
SiO2 (wt.%)	b.d.l.	b.d.l.	b.d.l.	b.d.l.	b.d.l.	b.d.l.	b.d.l.	b.d.l.	0.023	0.165	0.209	0.024	0.174	0	0.181	0.03	0.005	0.122	0	0.126	0.261	0.163	0.255	0.251	0.075	0.181	0.312	0.192	0.127	0.03	0.002	0.008	0.164	0.082	0.23	0.195	0.164	0.142	0.098	0.263	0.191	0.134	0.176	0.153	0.14	0.188	0.162	0.288	0.144
TiO2	0.044	0.183	0.175	0.17	0.329	0.278	0.05	0.018	0.045	0.009	0.11	0.115	0.025	0.141	0.057	0.091	0.169	0.06	0.132	0.336	0.078	0.09	0.034	0.045	0.028	0.077	0.088	0.077	0.014	0	0.083	0.145	0.24	0.089	0.028	0.267	0.156	0.315	0.405	0.022	0.127	0.156	0.148	0.134	0.289	0.255	0.112	2.216	0.215
FeO	3.613	12.1	10.05	11.41	12.37	11.85	9.13	5.67	13.244	14.192	14.208	15.43	11.326	10.139	12.062	10.295	15.845	13.576	11.348	14.43	6.958	10.768	11.798	7.424	13.221	7.295	4.422	10.214	10.543	5.075	11.703	8.07	11.925	13.437	14.037	12.255	10	14.657	14.967	11.815	9.275	9.137	9.636	9.709	12.671	11.258	9.58	8.324	11.845
MnO	12.579	5.811	7.587	6.695	5.226	5.88	0.98	1.321	6.633	3.971	3.797	4.737	6.716	9.455	6.33	9.887	4.069	4.635	8.633	4.017	10.468	7.853	4.148	9.045	6.479	11.139	12.504	7.986	7.81	14.522	8.119	11.592	5.701	3.846	2.346	5.678	8.653	3.816	3.739	4.677	8.974	8.663	8.789	8.573	5.764	6.413	8.586	7.694	6.45
CaO	b.d.l.	b.d.l.	b.d.l.	b.d.l.	b.d.l.	b.d.l.	b.d.l.	b.d.l.	b.d.l.	b.d.l.	b.d.l.	b.d.l.	b.d.l.	0.006	b.d.l.	0.029	b.d.l.	0.014	0.007	0.002	0.014	b.d.l.	0.012	0.013	0.034	0.028	0.018	b.d.l.	0.022	0.018	0.008	0.006	0.015	0.016	0.088	0.035	b.d.l.	0.027	0.021	0.148	0.01	b.d.l.	b.d.l.	b.d.l.	0.015	0.02	0.011	0.205	0.023
Na2O	b.d.l.	b.d.l.	b.d.l.	b.d.l.	b.d.l.	b.d.l.	b.d.l.	b.d.l.	0.01	0.007	b.d.l.	0.028	b.d.l.	b.d.l.	b.d.l.	b.d.l.	0.028	b.d.l.	b.d.l.	0.011	b.d.l.	b.d.l.	b.d.l.	0.017	b.d.l.	b.d.l.	0.007	0.017	b.d.l.	b.d.l.	b.d.l.	0.019	b.d.l.	b.d.l.	0.016	b.d.l.	0.018	0.016	0.016	b.d.l.	0.036	0.048	b.d.l.	0.018	b.d.l.	b.d.l.	b.d.l.	b.d.l.	b.d.l.
Nb2O5	42.194	45.606	43.09	46.557	45.933	41.712	66.65	62.94	67.049	46.631	40.295	68.776	47.002	66.991	46.132	66.935	68.071	47.818	66.846	48.393	30.94	47.281	26.701	31.244	60.831	46.074	35.759	46.814	52.389	63.5	68.156	65.275	37.645	42.628	37.824	42.028	46.9	48.284	53.298	32.242	44.194	45.318	44.605	44.039	43.386	38.392	44.169	20.742	46.184
Ta2O5	35.653	30.724	31.727	29.257	25.977	27.856	13.98	15.47	13.059	34.704	40.091	10.681	34.92	12.894	34.571	12.087	10.592	34.29	11.392	30.814	49.602	32.931	54.697	50.412	18.951	35.412	45.623	35.229	28.487	15.142	11.796	12.996	41.363	36.935	42.108	39.447	34.323	33.195	27.203	48.183	38.321	37.043	37.507	37.503	37.11	43.376	37.021	60.481	34.042
SnO2	0.085	0.027	0.075	0.027	0.09	0.106	0.02	0.07	0.037	0.051	0.112	0.052	0.019	0	0.018	0.059	0	0.039	0.022	0.198	0.075	0.061	0.709	0.424	0.042	0.02	0.107	0.013	0.033	0.095	0.073	0.081	0.169	0.469	2.919	0.016	0.078	0.039	0.116	0.834	0.064	0.015	0.037	0.058	0.016	0.032	0.075	1.216	0.012
UO2	b.d.l.	b.d.l.	b.d.l.	b.d.l.	b.d.l.	b.d.l.	b.d.l.	b.d.l.	b.d.l.	b.d.l.	b.d.l.	b.d.l.	b.d.l.	b.d.l.	b.d.l.	b.d.l.	b.d.l.	b.d.l.	b.d.l.	b.d.l.	b.d.l.	b.d.l.	b.d.l.	b.d.l.	b.d.l.	b.d.l.	b.d.l.	b.d.l.	b.d.l.	b.d.l.	b.d.l.	b.d.l.	b.d.l.	b.d.l.	b.d.l.	b.d.l.	b.d.l.	b.d.l.	b.d.l.	b.d.l.	b.d.l.	b.d.l.	b.d.l.	b.d.l.	b.d.l.	b.d.l.	b.d.l.	0.025	b.d.l.
WO3	b.d.l.	b.d.l.	b.d.l.	b.d.l.	b.d.l.	b.d.l.	0.26	0.13	0.506	0.292	0.401	0.477	0.19	0.694	0.152	0.485	0.393	0.255	1.005	0.385	0.303	0.208	0.234	0.335	0.202	0.21	0.336	0.114	0.213	0.378	0.566	0.813	0.858	0.823	0.207	0.45	0.345	0.326	0.406	0.198	0.236	0.078	0.329	0.127	0.633	0.296	0.174	0.487	0.436
ZrO2	b.d.l.	b.d.l.	b.d.l.	b.d.l.	b.d.l.	b.d.l.	b.d.l.	b.d.l.	b.d.l.	b.d.l.	b.d.l.	b.d.l.	b.d.l.	b.d.l.	b.d.l.	b.d.l.	b.d.l.	b.d.l.	b.d.l.	b.d.l.	0.03	b.d.l.	0.35	0.08	b.d.l.	b.d.l.	b.d.l.	b.d.l.	b.d.l.	b.d.l.	b.d.l.	0.085	b.d.l.	0.334	0.317	b.d.l.	b.d.l.	b.d.l.	b.d.l.	0.509	b.d.l.	b.d.l.	b.d.l.	b.d.l.	b.d.l.	b.d.l.	b.d.l.	0.221	b.d.l.
ThO2	b.d.l.	b.d.l.	b.d.l.	b.d.l.	b.d.l.	b.d.l.	b.d.l.	b.d.l.	b.d.l.	0.024	b.d.l.	b.d.l.	0.005	0.021	b.d.l.	b.d.l.	0.011	b.d.l.	b.d.l.	b.d.l.	0.02	0.035	b.d.l.	0.013	0.025	0.034	0.024	0.003	b.d.l.	b.d.l.	0.022	b.d.l.	b.d.l.	b.d.l.	b.d.l.	b.d.l.	b.d.l.	b.d.l.	b.d.l.	0.003	0.019	b.d.l.	b.d.l.	0.034	b.d.l.	b.d.l.	b.d.l.	b.d.l.	0.025
TOTAL	94.282	94.483	92.703	94.169	89.989	87.679	91.08	85.614	100.606	100.046	99.245	100.324	100.377	100.341	99.503	99.899	99.183	100.809	99.385	98.712	98.749	99.39	98.938	99.303	99.888	100.472	99.2	100.659	99.64	98.76	100.528	99.09	98.08	98.659	100.12	100.371	100.637	100.817	100.269	98.894	101.447	100.592	101.227	100.348	100.024	100.23	99.89	101.899	99.376
Normalized to	6 Oxygens
Si (a.p.f.u.)	0	0	0	0	0	0	0	0	0	0.01	0.01	0	0.01	0	0.01	0	0	0.01	0	0.01	0.02	0.01	0.02	0.02	0	0.01	0.02	0.01	0.01	0	0	0	0.01	0.01	0.02	0.01	0.01	0.01	0.01	0.02	0.01	0.01	0.01	0.01	0.01	0.01	0.01	0.02	0.01
Ti	0.00229719	0.00937077	0.00920869	0.00867823	0.0173909	0.0153433	0.00240693	0.000923244	0	0	0.01	0.01	0	0.01	0	0	0.01	0	0.01	0.02	0	0	0	0	0	0	0	0	0	0	0	0.01	0.01	0	0	0.01	0.01	0.02	0.02	0	0.01	0.01	0.01	0.01	0.01	0.01	0.01	0.12	0.01
Fe	0.21	0.69	0.59	0.65	0.73	0.73	0.488768	0.323133	0.65	0.77	0.8	0.75	0.61	0.5	0.66	0.51	0.78	0.73	0.56	0.78	0.41	0.59	0.72	0.44	0.67	0.4	0.26	0.55	0.56	0.26	0.57	0.4	0.69	0.75	0.8	0.68	0.54	0.78	0.79	0.7	0.5	0.5	0.52	0.53	0.7	0.64	0.53	0.5	0.65
Mn	0.739684	0.335143	0.449661	0.384936	0.311137	0.365517	0.0531344	0.0763137	0.33	0.22	0.22	0.23	0.37	0.47	0.35	0.49	0.2	0.25	0.43	0.22	0.63	0.43	0.26	0.54	0.33	0.61	0.73	0.44	0.42	0.75	0.4	0.59	0.33	0.22	0.13	0.32	0.47	0.21	0.2	0.28	0.49	0.48	0.48	0.48	0.32	0.37	0.48	0.47	0.36
Ca	0	0	0	0	0	0	0	0	0	0	0	0	0	0	0	0	0	0	0	0	0	0	0	0	0	0	0	0	0	0	0	0	0	0	0.01	0	0	0	0	0.01	0	0	0	0	0	0	0	0.02	0
Na	0	0	0	0	0	0	0	0.00661188	0	0	0	0	0	0	0	0	0	0	0	0	0	0	0	0	0	0	0	0	0	0	0	0	0	0	0	0	0	0	0	0	0	0.01	0	0	0	0	0	0	0
Nb	1.32433	1.40394	1.36313	1.42879	1.45967	1.384	1.92884	1.94076	1.78	1.37	1.23	1.82	1.38	1.79	1.37	1.79	1.82	1.39	1.79	1.42	0.99	1.39	0.88	1	1.67	1.35	1.12	1.37	1.5	1.74	1.81	1.77	1.17	1.29	1.16	1.26	1.37	1.4	1.51	1.03	1.3	1.34	1.31	1.31	1.29	1.17	1.32	0.67	1.37
Ta	0.673128	0.56893	0.603734	0.540093	0.496561	0.555968	0.243365	0.28694	0.21	0.61	0.74	0.17	0.62	0.21	0.62	0.19	0.17	0.6	0.18	0.54	0.96	0.58	1.08	0.97	0.31	0.63	0.86	0.62	0.49	0.25	0.19	0.21	0.78	0.67	0.78	0.71	0.6	0.58	0.46	0.92	0.68	0.66	0.66	0.67	0.67	0.8	0.66	1.18	0.61
Sn	0.00235302	0.000733078	0.00209259	0.000730817	0.0025225	0.003102	0.000510489	0.00190373	0	0	0	0	0	0	0	0	0	0	0	0.01	0	0	0.02	0.01	0	0	0	0	0	0	0	0	0	0.01	0.08	0	0	0	0	0.02	0	0	0	0	0	0	0	0.03	0
U	0	0	0	0	0	0	0	0	0	0	0	0	0	0	0	0	0	0	0	0	0	0	0	0	0	0	0	0	0	0	0	0	0	0	0	0	0	0	0	0	0	0	0	0	0	0	0	0	0
W	0	0	0	0	0	0	0.00431328	0.00229788	0.01	0	0.01	0.01	0	0.01	0	0.01	0.01	0	0.02	0.01	0.01	0	0	0.01	0	0	0.01	0	0	0.01	0.01	0.01	0.02	0.01	0	0.01	0.01	0.01	0.01	0	0	0	0.01	0	0.01	0.01	0	0.01	0.01
Zr	0	0	0	0	0	0	0	0	0	0	0	0	0	0	0	0	0	0	0	0	0	0	0.01	0	0	0	0	0	0	0	0	0	0	0.01	0.01	0	0	0	0	0.02	0	0	0	0	0	0	0	0.01	0
Th	0	0	0	0	0	0	0	0	0	0	0	0	0	0	0	0	0	0	0	0	0	0	0	0	0	0	0	0	0	0	0	0	0	0	0	0	0	0	0	0	0	0	0	0	0	0	0	0	0
Ta/(Ta+Nb)	0.336992	0.288377	0.306952	0.274314	0.253836	0.286585	0.112036	0.128805	0.105528	0.308081	0.375635	0.0854271	0.31	0.105	0.311558	0.0959596	0.0854271	0.301508	0.0913706	0.27551	0.492308	0.294416	0.55102	0.492386	0.156566	0.318182	0.434343	0.311558	0.246231	0.125628	0.095	0.106061	0.4	0.341837	0.402062	0.360406	0.304569	0.292929	0.233503	0.471795	0.343434	0.33	0.335025	0.338384	0.341837	0.406091	0.333333	0.637838	0.308081
Mn/(Mn+Fe)	0.78	0.33	0.43	0.37	0.3	0.33	0.0980516	0.191048	0.336735	0.222222	0.215686	0.234694	0.377551	0.484536	0.346535	0.49	0.204082	0.255102	0.434343	0.22	0.605769	0.421569	0.265306	0.55102	0.33	0.60396	0.737374	0.444444	0.428571	0.742574	0.412371	0.59596	0.323529	0.226804	0.139785	0.32	0.465347	0.212121	0.20202	0.285714	0.494949	0.489796	0.48	0.475248	0.313725	0.366337	0.475248	0.484536	0.356436
Formulations were carried out from the METALESCRITICOS base data [121].
[truncated: 35 more columns]
